# Supplementary material
Source: MDPI journal article supplement (https://www.mdpi.com/2673-8937/2/4/46)
Supplement: s1 [file s1]

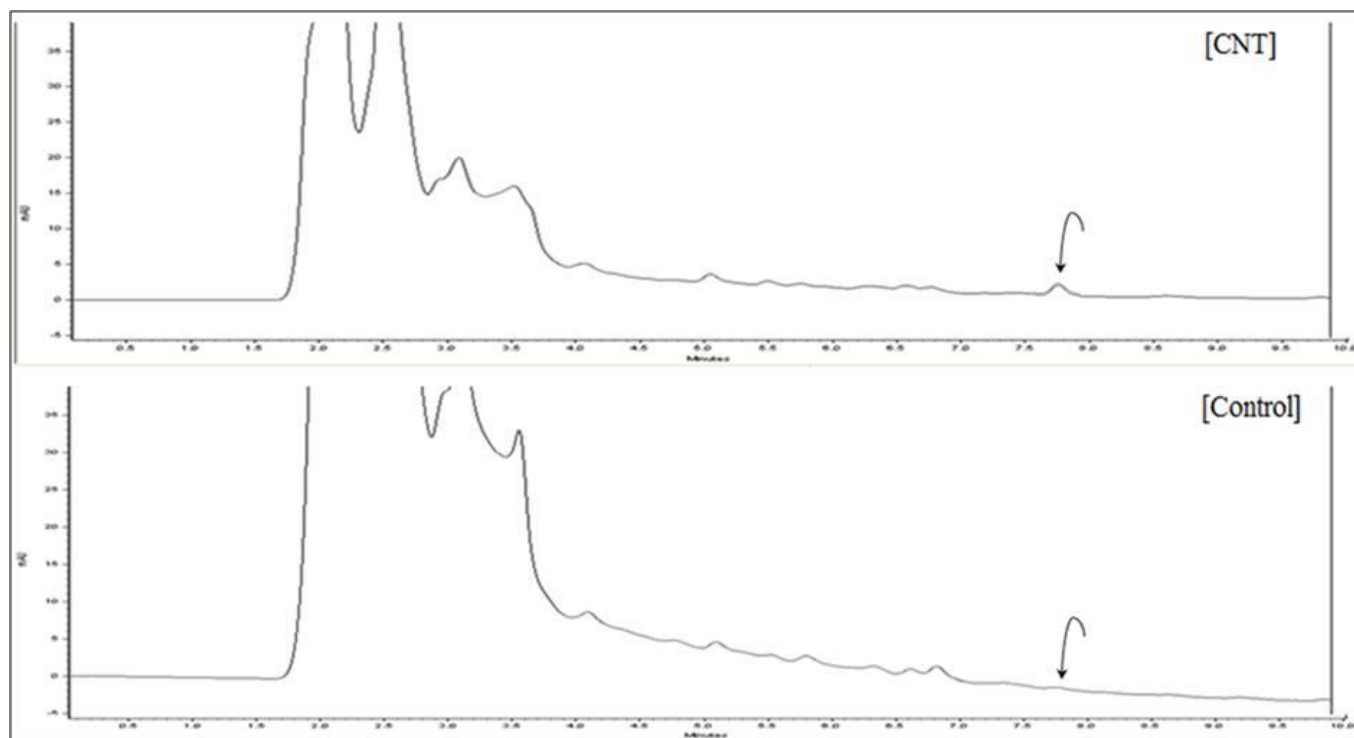

**Supplementary Figure S1.** HPLC profile of extract of cell grown in MS with CNTs and without CNTs. Arrow on image shows the gossypol peak.

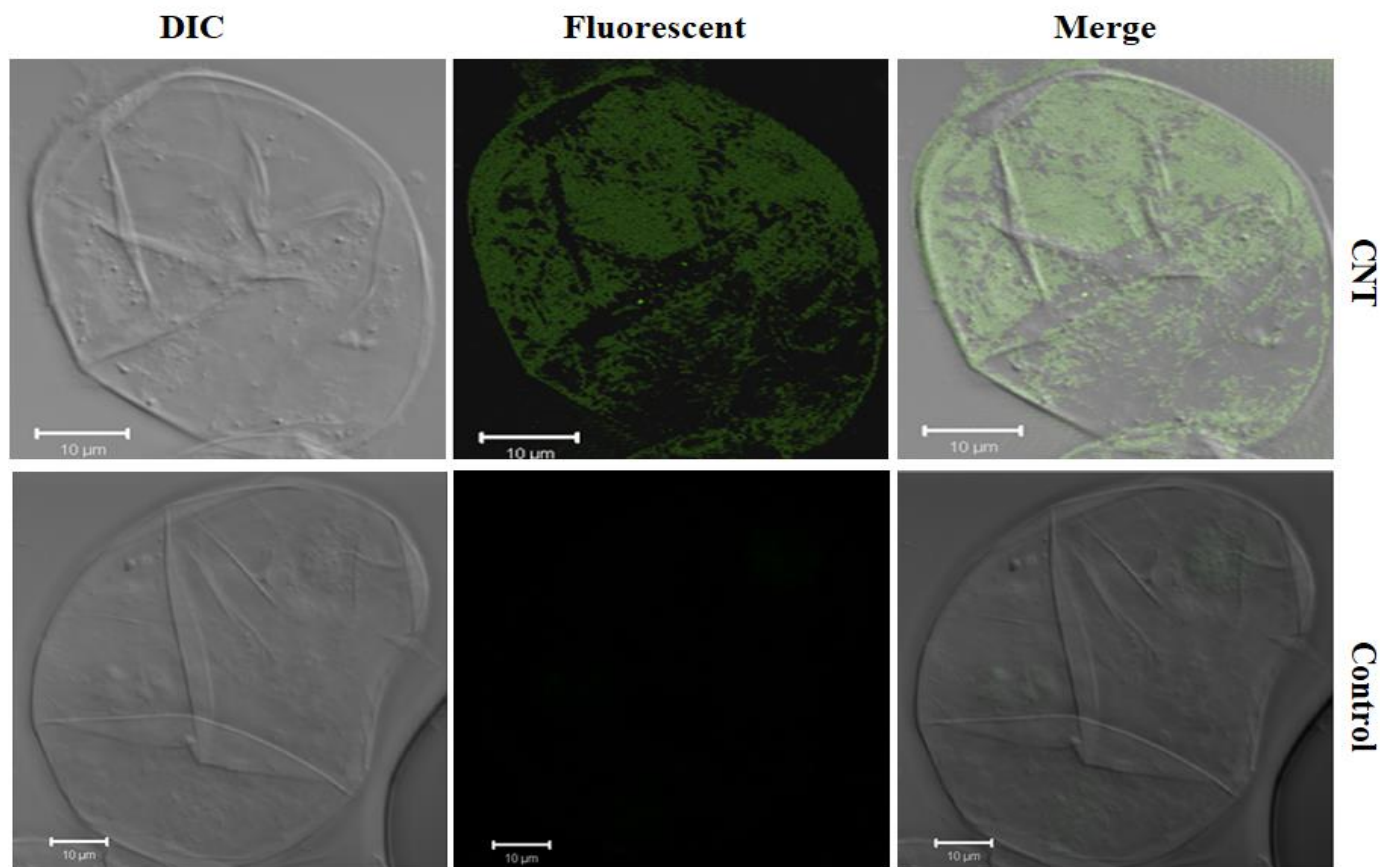

**Supplementary Figure S2.** Confocal Imaging of cotton cells. Cells grown in 20 µg/g CNT showed green dots on surface (lower panel, showed by red marks), which was not observed on cells grown in control MS (upper panel). These green dots confirmed the presence of CNTs on cell surface. Image was captured at excitation 405 and emission LP 475 at 63X optical with additional digital zoom.
